# Supplementary material
Source: Springer Nature journal article supplement (https://www.springermedizin.de/resource/supplementary/13058_2011_2965_MOESM6_ESM.pdf/9702894)

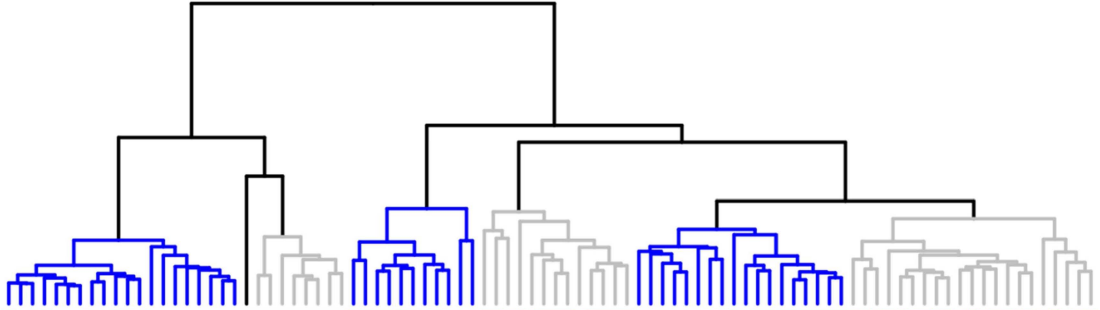

Molecular Subtypes  
(miRNA)

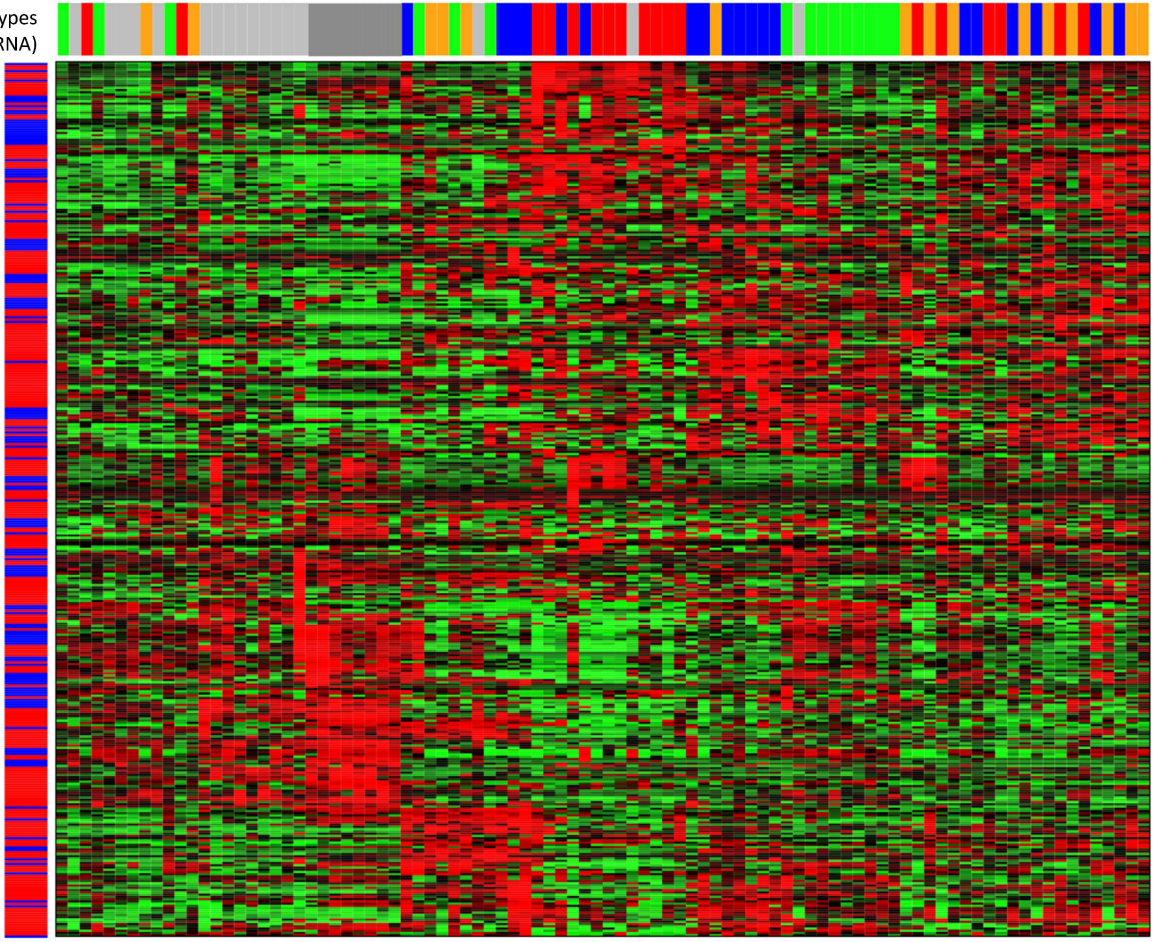

Supplement: MOESM6 [file 9702894]
